# Supplementary material
Source: PubMed Central journal article supplement (PMC3911314)
Supplement: JCM.03217-13_zjm999093128so1.pdf [file JCM.03217-13_zjm999093128so1.pdf]

**Supplemental Table. Microbiology of PJI subjects with positive sonicate fluid culture or PCR-ESI/MS**

| <b>Organism</b>                                   | <b>Sonicate fluid culture -<br/>number detected</b> | <b>PCR-ESI/MS –<br/>number detected</b> |
|---------------------------------------------------|-----------------------------------------------------|-----------------------------------------|
| coagulase-negative <i>Staphylococcus</i> sp.(SCN) | 39                                                  | 40                                      |
| <i>Staphylococcus aureus</i>                      | 24                                                  | 28                                      |
| polymicrobial                                     | 13 <sup>a</sup>                                     | 12 <sup>b</sup>                         |
| <i>Enterococcus</i> sp.                           | 5                                                   | 6                                       |
| <i>Propionibacterium acnes</i>                    | 4                                                   | 6                                       |
| <i>Pseudomonas aeruginosa</i>                     | 3                                                   | 3                                       |
| viridans group <i>Streptococcus</i> sp.           | 2                                                   | 4                                       |
| <i>Streptococcus agalactiae</i>                   | 2                                                   | 3                                       |
| <i>Escherichia coli</i>                           | 2                                                   | 2                                       |
| <i>Fingoldia magna</i>                            | 2                                                   | 2                                       |
| group G <i>Streptococcus</i> sp.                  | 2                                                   | 1                                       |
| <i>Serratia marcescens</i>                        | 1                                                   | 3                                       |
| <i>Streptococcus dysgalactiae</i>                 | 1                                                   | 2                                       |
| <i>Actinomyces naeslundii</i>                     | 1                                                   | 1                                       |
| <i>Candida albicans</i>                           | 1                                                   | 1                                       |
| <i>Capnocytophaga canimorsus</i>                  | 1                                                   | 1                                       |
| <i>Abiotrophia/Granulicatella</i> sp.             | 1                                                   | 1                                       |
| <i>Proteus mirabilis</i>                          | 1                                                   | 1                                       |
| <i>Corynebacterium simulans</i>                   | 1                                                   | 0                                       |
| <i>Streptococcus pyogenes</i>                     | 0                                                   | 1                                       |

<sup>a</sup>Includes three SCN plus *Enterococcus* sp.; one each of SCN plus *Corynebacterium* sp., SCN plus *P. acnes*, SCN plus *F. magna*, SCN plus *S. aureus*, *S. aureus* plus *F. magna*; SCN plus *Corynebacterium* sp. plus *E. coli*, SCN plus *Corynebacterium* sp. plus *S. aureus*, *S. aureus* plus *F. magna* plus *Enterococcus* sp., *F. magna* plus *Peptostreptococcus* sp. plus *Actinomyces neuii* plus *Porphyromonas* sp. plus *P. aeruginosa* plus *S. aureus*, and *Actinomyces odontolyticus* plus *Prevotella melaninogenica* plus *Enterococcus* sp. plus

*Abiotropia/Granulicatella* sp. plus *F. magna* plus *Veillonella* sp. plus viridans group *Streptococcus* sp. plus *Pandoraea norinbergensis*

<sup>b</sup> Includes one each of *Staphylococcus epidermidis* plus *Enterococcus faecium*, *S. epidermidis* plus *Enterococcus faecalis*, *S. epidermidis* plus *Corynebacterium striatum*, *S. epidermidis* plus *F. magna*; *Staphylococcus lugdunensis* plus *F. magna*, *Burkholderia multivorans* plus *F. magna*, *P. melaninogenica* plus *F. magna*, *S. lugdunensis* plus viridans/mitis group *Streptococcus* sp., *S. aureus* plus *E. faecium*, *S. aureus* plus *P. aeruginosa*, *S. aureus* plus *F. magna* plus *Enterobacter cloacae* complex, and *E. coli* plus *Shigella boydii* plus *S. epidermidis*
